# Supplementary material
Source: PubMed Central journal article supplement (PMC2063486)

**Figure S1**

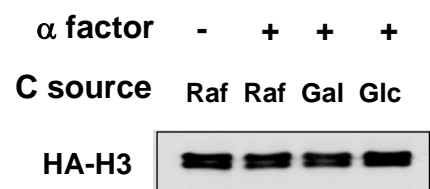

Supplement: 7601870s1.pdf [file 7601870s1.pdf]

Figure S2

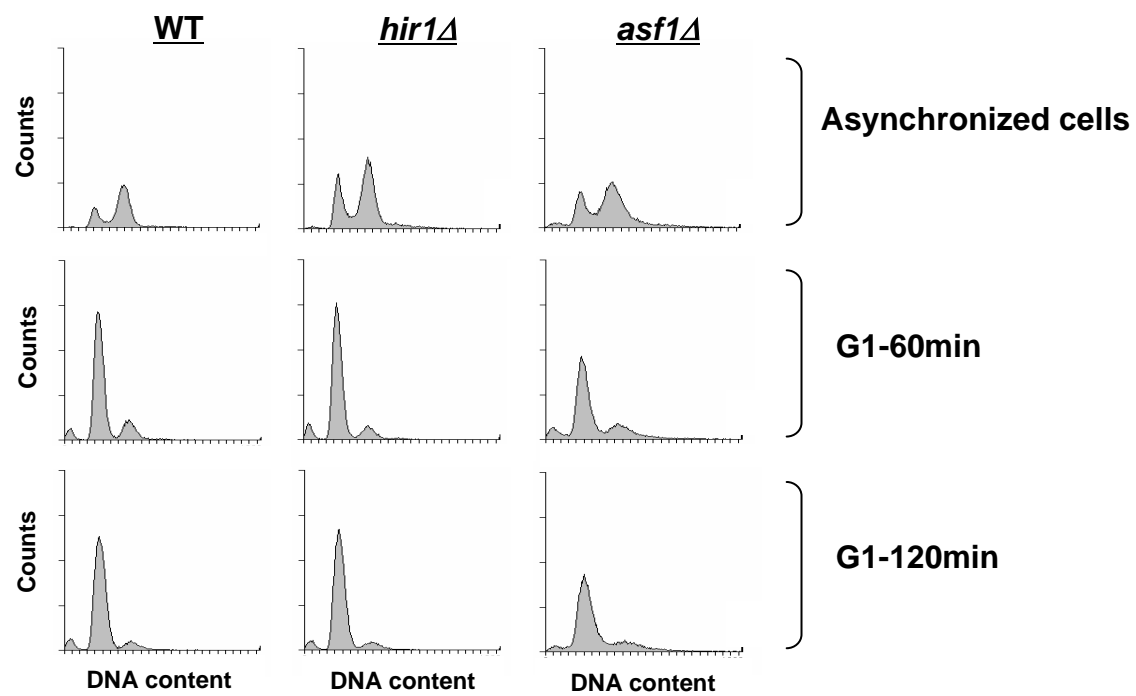

Supplement: 7601870s2.pdf [file 7601870s2.pdf]

**Figure S3**

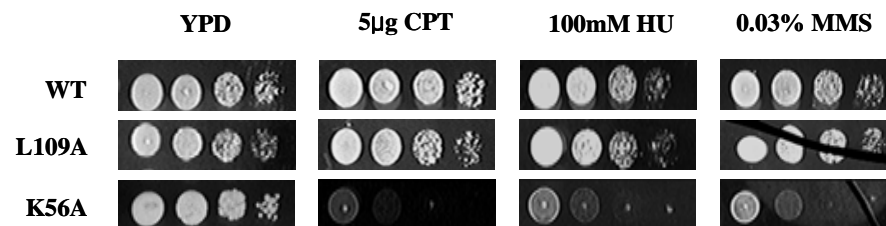

Supplement: 7601870s3.pdf [file 7601870s3.pdf]
